# Supplementary material for: NMR Metabolomics of Primary Ovarian Cancer Cells in Comparison to Established Cisplatin-Resistant and -Sensitive Cell Lines
Source: MDPI journal article supplement (doi:10.3390/cells13080661), 2024-04-09
Supplement: s1 [file s1]

**NMR metabolomics of primary ovarian cancer cells in comparison to established cisplatin-resistant and sensitive cell lines.**

**Veronica Ghini<sup>1,2\*</sup>, Flavia Sorbi<sup>3</sup>, Massimiliano Fambrini<sup>3</sup>, Francesca Magherini<sup>3\*</sup>**

<sup>1</sup>Department of Chemistry, University of Florence, Italy.

<sup>2</sup>Magnetic Resonance Center (CERM), University of Florence, Italy.

<sup>3</sup>Department of Experimental and Clinical Biomedical Sciences "Mario Serio" University of Florence  
Viale G.B. Morgagni 50, 50134, Florence, Italy,

**Supporting Information**

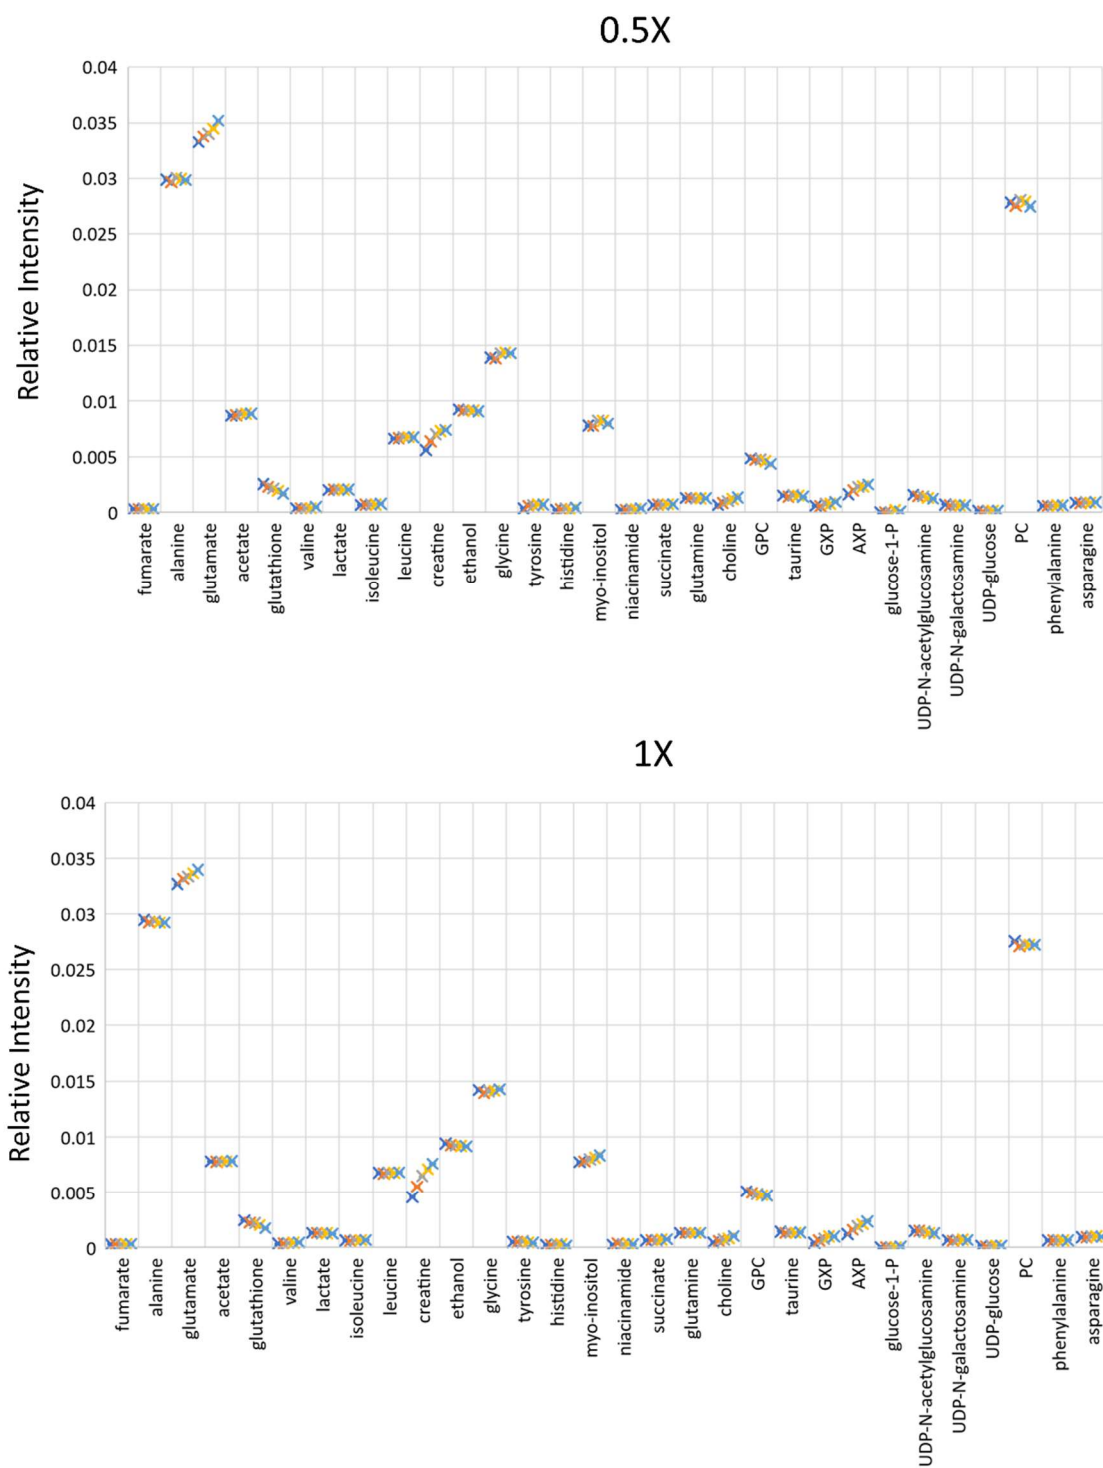

**Figure S1.** Stability test. Relative concentration levels of metabolites in a cell lysate sample, prepare with different concentrations of protease and phosphate inhibitor cocktail (0.5X and 1X) and acquired at different time points. Blue crosses: T0 , orange crosses: T=30 min, gray crosses: T=60 min, yellow crosses: T= 90 min and cyan crosses: T=120 min.

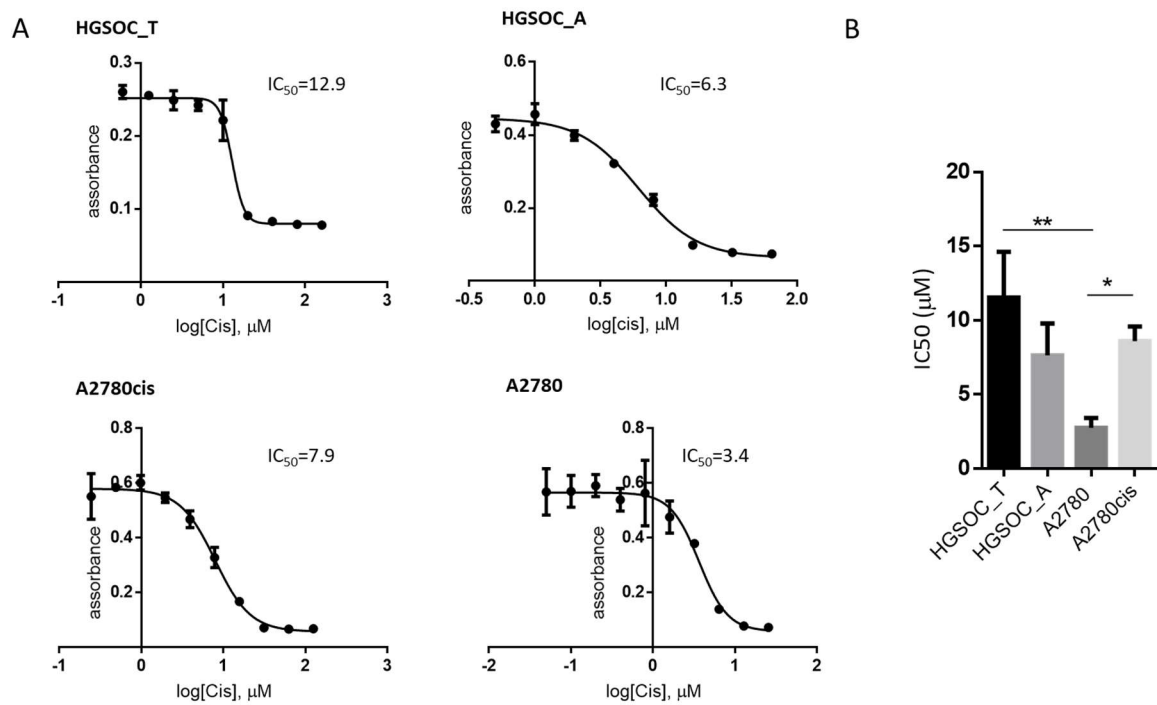

**Figure S2.** A) Representative cytotoxicity-curves of cisplatin after 72 hours of treatments determined by MTT assay. B) Histogram reports media $\pm$ SD of  $\text{IC}_{50}$  measured in HGSOC\_T , HGSOC\_A, A2780 and A2780cis cells. Statistical analysis was performed with Anova using GraphPad Prism software; \* indicates p-value < 0.05. \*\*indicates p-value < 0.01
